# Supplementary material for: The Impact of Blood Pressure Dipping Status on Cognition, Mobility, and Cardiovascular Health in Older Adults Following an Exercise Program
Source: PubMed Central journal article supplement — Gerontol Geriatr Med. 2018 Apr 23;4:2333721418770333. doi: 10.1177/2333721418770333 (PMC5946337; doi:10.1177/2333721418770333), 2018-04-23
Supplement: Supplemental_Table_1.pdf [file Supplemental_Table_1.pdf]

Supplemental Table 1. Estimated mean change within groups from baseline in all study

| Outcomes                                     | Estimated mean change (95% CI) |                           |                             |                          |                            |                          |
|----------------------------------------------|--------------------------------|---------------------------|-----------------------------|--------------------------|----------------------------|--------------------------|
|                                              | 3 months                       |                           | 6 months                    |                          | 12 months                  |                          |
|                                              | Dippers                        | Nondippers                | Dippers                     | Nondippers               | Dippers                    | Nondippers               |
| Cognition, z scores                          |                                |                           |                             |                          |                            |                          |
| Global cognitive function                    | <b>.32 (.21 to .43)</b>        | <b>.31 (.21 to .41)</b>   | <b>.54 (.42 to .66)</b>     | <b>.49 (.37 to .6)</b>   | <b>.58 (.45 to .7)</b>     | <b>.51 (.39 to .63)</b>  |
| Executive function                           | <b>.22 (.01 to .42)</b>        | .17 (–.01 to .36)         | <b>.33 (.13 to .52)</b>     | <b>.35 (.17 to .52)</b>  | <b>.44 (.24 to .64)</b>    | <b>.37 (.17 to .56)</b>  |
| Processing speed                             | .14 (–.01 to .29)              | <b>.14 (.002 to .28)</b>  | <b>.32 (.15 to .5)</b>      | <b>.19 (.03 to .35)</b>  | <b>.29 (.09 to .49)</b>    | <b>.26 (.07 to .45)</b>  |
| Memory                                       | <b>.56 (.35 to .77)</b>        | <b>.49 (.29 to .68)</b>   | <b>.98 (.72 to 1.23)</b>    | <b>.88 (.64 to 1.11)</b> | <b>1.04 (.8 to 1.28)</b>   | <b>.93 (.7 to 1.15)</b>  |
| Verbal fluency                               | <b>.39 (.2 to .57)</b>         | <b>.46 (.29 to .62)</b>   | <b>.52 (.31 to .73)</b>     | <b>.56 (.36 to .75)</b>  | <b>.5 (.28 to .73)</b>     | <b>.52 (.3 to .73)</b>   |
| Mobility                                     |                                |                           |                             |                          |                            |                          |
| Usual gait velocity, cm/s                    | 2.1 (–2.5 to 6.7)              | <b>6.9 (2.7 to 11.1)</b>  | 1.8 (–3 to 6.6)             | <b>9.4 (4.9 to 13.8)</b> | –1 (–5.4 to 5.1)           | <b>6.8 (1.9 to 11.7)</b> |
| Usual step length, cm                        | .9 (–.9 to 2.4)                | <b>2.9 (1.5 to 4.3)</b>   | .4 (–1.2 to 1.9)            | <b>3.4 (2 to 4.8)</b>    | –.4 (–2.1 to 1.3)          | <b>1.7 (.2 to 3.3)</b>   |
| Usual gait variability, %                    | –.8 (–1.9 to .3)               | –.3 (–1.3 to .6)          | –.7 (–1.8 to .5)            | .2 (–1.2 to .8)          | –.8 (–1.8 to .3)           | –.3 (–1.2 to .7)         |
| DT gait velocity, cm/s                       | 3.1 (–4.1 to 10.3)             | 6.1 (–.6 to 12.7)         | 5.9 (–1.4 to 13.2)          | <b>9.3 (2.6 to 16)</b>   | 7.7 (–.1 to 15.5)          | –.3 (–7.7 to 7)          |
| DT step length, cm                           | .2 (–1.9 to 2.3)               | <b>2.1 (.1 to 4)</b>      | 1.7 (–.9 to 4.3)            | <b>3.5 (1.1 to 5.8)</b>  | 1.2 (–1.5 to 4)            | .6 (–2 to 3.2)           |
| DT gait variability, %                       | 1.1 (–1.8 to 4)                | –.7 (–3.4 to 1.9)         | 1.5 (–2.3 to 5.2)           | –.6 (–4 to 2.9)          | –2.1 (–4.3 to –.01)        | –.3 to –2.3 to 1.7)      |
| Cardiovascular health                        |                                |                           |                             |                          |                            |                          |
| cIMT, mm                                     | .04 (–.004 to .09)             | .025 (–.04 to .09)        | .03 (–.03 to .08)           | <b>.06 (.01 to .11)</b>  | .04 (–.01 to .09)          | .02 (–.03 to .07)        |
| cAC, mm/mmHg <sup>2</sup> × 10 <sup>–1</sup> | <b>.15 (.001 to .27)</b>       | <b>.21 (.08 to .35)</b>   | .13 (–.01 to .27)           | .11 (–.01 to .24)        | .1 (–.04 to .25)           | <b>.17 (.04 to .31)</b>  |
| Daytime SBP, mmHg                            | <b>–4.4 (–8.3 to –.6)</b>      | .2 (–3.3 to 3.6)          | <b>–6.2 (–10.6 to –1.9)</b> | .7 (–3.2 to 4.5)         | <b>–5.6 (–9.3 to –1.9)</b> | 1.9 (–1.8 to 5.5)        |
| Daytime DBP, mmHg                            | –1.1 (–3.3 to 1.1)             | –.9 (–2.9 to 1.2)         | <b>–2.6 (–5.1 to –.1)</b>   | .1 (–2.1 to 2.3)         | <b>–2.7 (–5.3 to –.1)</b>  | .5 (–2.1 to 3.1)         |
| Nighttime SBP, mmHg                          | –.7 (–4.7 to 3.3)              | <b>–3.8 (–7.4 to –.2)</b> | 2.5 (–1.8 to 6.7)           | –3.1 (–6.9 to .6)        | –2.9 (–6.5 to .7)          | –3.1 (–6.6 to .4)        |
| Nighttime DBP, mmHg                          | .4 (–2.1 to 2.9)               | –2.2 (–4.5 to .04)        | 2.2 (–.4 to 4.7)            | –1.3 (–3.6 to 1)         | –.6 (–2.8 to 1.7)          | –1.8 (–4 to .4)          |

outcomes.

Confidence intervals not including zero (i.e., bold numbers) indicate significant estimated mean change from baseline adjusting for age, education, gender, presence of hypertension and type 2 diabetes.

Abbreviations: 95% CI, confidence interval; DT, dual-task gait serial sevens; cIMT, carotid intima-media thickness; cAC, carotid arterial compliance; SBP, systolic blood pressure; DBP, diastolic blood pressure.
